# Supplementary material
Source: PubMed Central journal article supplement (PMC5808577)
Supplement: NIHMS933817-supplement-14.pdf [file NIHMS933817-supplement-14.pdf]

**Table S2. Oligonucleotide Sequences Used to Amplify In Situ Probes, Related to STAR Methods.**

T7 RNA polymerase promoter sequences introduced at the 5'-end of antisense primer are indicated in blue.

LS-transcriptB2-ctg#: Contig number from Little Skate Transcriptome (Little Skate Transcriptomic Contigs Build 2)

[GEO:GSM643957]

| Gene            | Primer Sequence |                                              | Source                   |
|-----------------|-----------------|----------------------------------------------|--------------------------|
| Skate           | (5'-3')         |                                              |                          |
| <i>Hoxa5</i>    | fw              | ATGAGCTCTTACTTTGTAAACTCA                     | FJ944024                 |
|                 | rev             | TAATACGACTCACTATAGGGGCAATTTCTATCCGTCGTCTCCGG | (Genbank accession #)    |
| <i>Hoxa6</i>    | fw              | ATGAGTTCGTATTTTGTGAACCCT                     |                          |
|                 | rev             | TAATACGACTCACTATAGGGTTACTCCCCTGTTTATCTTCTGC  |                          |
| <i>Hoxa7</i>    | fw              | ATGAGTTCGTCTGATTATGTGAAT                     |                          |
|                 | rev             | TAATACGACTCACTATAGGGTCATTCTGTTTTCTCGTTGT     |                          |
| <i>Hoxa9</i>    | fw              | ATGTCGACATCGGGGACTATCAGC                     |                          |
|                 | rev             | TAATACGACTCACTATAGGGTTCGGTGAGATTGAGAACCCGGGC |                          |
| <i>Hoxd9</i>    | fw              | ATGTCGACCGGTGGCACCATACAC                     | LS-transcriptB2-ctg10923 |
|                 | rev             | TAATACGACTCACTATAGGGAACCTCATAGCGCGGTCTCTGGT  |                          |
| <i>Hoxd10</i>   | fw              | ATGTCCTGTCCAATAGCTCTCCC                      | LS-transcriptB2-ctg14651 |
|                 | rev             | TAATACGACTCACTATAGGGTTTGGTCTCTTCTCCGCCTTTT   |                          |
| <i>EphA4</i>    | fw              | AAGTTACGCTGCTGGATTCCCGGT                     | LS-transcriptB2-ctg52935 |
|                 | rev             | TAATACGACTCACTATAGGGCTGTTGCATTTCTTACAGAGCACG |                          |
| <i>EphB1</i>    | fw              | GTGGAAGAGACCCTGTTGGACACT                     | LS-transcriptB2-ctg13636 |
|                 | rev             | TAATACGACTCACTATAGGGAAACTCCACATTCTCGTCACAGCG |                          |
| <i>EphrinA5</i> | fw              | GGGAGGAAAGATGCTGTGACTGAT                     | LS-transcriptB2-ctg22055 |
|                 | rev             | TAATACGACTCACTATAGGGCGAGCTGTAGCCATCATAATTAC  |                          |
| <i>Lmx1b</i>    | fw              | GCTTGGATTGCAACTCTGTTAGGT                     | LS-transcriptB2-ctg26181 |
|                 | rev             | TAATACGACTCACTATAGGGAGCAGGTCCTTCTCCTTCTCGTAG |                          |
| <i>Ret</i>      | fw              | CCAGACGAACGGGCCTTGACCATG                     | LS-transcriptB2-ctg32294 |
|                 | rev             | TAATACGACTCACTATAGGGATCTAGTAAATGCATGTGAAATTC |                          |
| <i>Meis</i>     | fw              | CGATGGCGCAGAGGTACGATGAGA                     | LS-transcriptB2-ctg16040 |
|                 | rev             | TAATACGACTCACTATAGGGCGGTGATGCTACACTGTTGTCCAA |                          |
| <i>Scip</i>     | fw              | ATGGCCACCACAGCTTCGGCTCAT                     | LS-transcriptB2-ctg19326 |
|                 | rev             | TAATACGACTCACTATAGGGGTCTTCTGTTACAAAACCAAATC  |                          |
| <i>VACHT</i>    | fw              | GACATACAGATCGGAGTTCTGT                       | LS-transcriptB2-ctg16025 |
|                 | rev             | TAATACGACTCACTATAGGGTCCGTAGAACCATTGTAAGTTGGG |                          |
| <i>Gata2</i>    | fw              | ATGAATGCAGCAACAGTCTCTTCC                     | LS-transcriptB2-ctg17283 |
|                 | rev             | TAATACGACTCACTATAGGGGGGATAAAATGCTGTTGGGGTCA  |                          |

|                 |     |                                              |                          |
|-----------------|-----|----------------------------------------------|--------------------------|
| <b>Gata3</b>    | fw  | AGAAGGTCGAGAATGTGTCAATTG                     | LS-transcriptB2-ctg91343 |
|                 | rev | TAATACGACTCACTATAGGGCTCGTTGGGGAGATATTGGTGCAG |                          |
| <b>Chx10</b>    | fw  | CAAGTGGAGGAAGCGTGAGAAGTG                     | LS-transcriptB2-ctg33646 |
|                 | rev | TAATACGACTCACTATAGGGGTTTAGAACTTGTCAGTGGCGATC |                          |
| <b>Slit3</b>    | fw  | GCCACATCATGTCCACCGGC                         |                          |
|                 | rev | TAATACGACTCACTATAGGGCTCTGAGCCTGAGCAACGGAAC   |                          |
| <b>Onecut1</b>  | fw  | CATGCTCGGGCGAGCGAACGC                        |                          |
|                 | rev | TAATACGACTCACTATAGGGACTGTTGTGAGTTGTGCAATG    |                          |
| <b>Nell2</b>    | fw  | TGATCCGCGGCTGACCAAGTC                        |                          |
|                 | rev | TAATACGACTCACTATAGGGGAAGACAAGCAATTCAGCAATC   |                          |
| <b>Nrcam</b>    | fw  | TGTACTIONGGAGTGCATTGCTG                      |                          |
|                 | rev | TAATACGACTCACTATAGGGGGACCACTCCATGAGTAT TGG   |                          |
| <b>Ngfr</b>     | fw  | AGAGCAAGCAGTCAGTCCATC                        |                          |
|                 | rev | TAATACGACTCACTATAGGGCGAAGTGAGATACATTCAGCG    |                          |
| <b>Pappa2</b>   | fw  | GATCTTGCCACATCTTGGGC                         |                          |
|                 | rev | TAATACGACTCACTATAGGGGATTGGTGTGCCAGAATATC     |                          |
| <b>Cdh7</b>     | fw  | GCC AGC AAG GAC TAC TAA AGG                  |                          |
|                 | rev | TAATACGACTCACTATAGGGGTCTCTGACCTGTGTCTGAC     |                          |
| <b>Amigo1</b>   | fw  | CTGTGCATCTACCCGAAACC                         |                          |
|                 | rev | TAATACGACTCACTATAGGGCTTTACCAGTCCCTGGAAGTG    |                          |
| <b>Unc5c</b>    | fw  | AGCTGCGGACATCTCAAGATG                        |                          |
|                 | rev | TAATACGACTCACTATAGGGCACGAGGACCAGCCTCCGTTT    |                          |
| <b>Irx5</b>     | fw  | GTCCATACTCTTGCCAGCGAC                        |                          |
|                 | rev | TAATACGACTCACTATAGGGCGGACAGTTTGAATCGACCG     |                          |
| <b>Lrp1b</b>    | fw  | GGGGATAAAGATTGTCCAGACGG                      |                          |
|                 | rev | TAATACGACTCACTATAGGGGTGTAGTTGAATCCATCTATAC   |                          |
| <b>Zfp804a</b>  | fw  | CCAGGGAGTGGTCCCATGTTC                        |                          |
|                 | rev | TAATACGACTCACTATAGGGACTTTGTGTTGAGGGTTGC      |                          |
| <b>Id4</b>      | fw  | ACTCCAAGCTCAAGCAGTTGG                        |                          |
|                 | rev | TAATACGACTCACTATAGGGGAGATTGCCAGGCGCACC       |                          |
| <b>Prph</b>     | fw  | GTACCGTGTGTCGAGCTCCAG                        |                          |
|                 | rev | TAATACGACTCACTATAGGGGCTTCTCTTCCAACCGCTGC     |                          |
| <b>Pcdhga10</b> | fw  | GCCAAATTTAAGTGTTCTAC                         |                          |
|                 | rev | TAATACGACTCACTATAGGGGCAAAACGTGGGGCATTATC     |                          |
| <b>Ndnf</b>     | fw  | ACTCTGGAGGTCAGGAGATCC                        |                          |
|                 | rev | TAATACGACTCACTATAGGGCATTCTCTGAAATGCTGC GCG   |                          |

|                       |                 |                                            |        |
|-----------------------|-----------------|--------------------------------------------|--------|
| <b><i>Pcdh19</i></b>  | fw              | GTCGGCTCTGGCTACTTGGTG                      |        |
|                       | rev             | TAATACGACTCACTATAGGGCAAGAGCAGCTGACCACGTTC  |        |
| <b><i>Sema5b</i></b>  | fw              | CGGGATTACAGCCAGGCAGAG                      |        |
|                       | rev             | TAATACGACTCACTATAGGGCATCTCGCCACGCCGTTGAAC  |        |
| <b><i>Bnc2</i></b>    | fw              | CAACCTGCGGACCTGTGACCAG                     |        |
|                       | rev             | TAATACGACTCACTATAGGGGGTGAACACTGGACGGGTTGC  |        |
|                       |                 |                                            |        |
| <b>Gene</b>           | Primer Sequence |                                            | Source |
| <b>Mouse</b>          | (5'-3')         |                                            |        |
| <b><i>Pappa2</i></b>  | fw              | ATGGTCCTATTGGGCAATCGC                      |        |
|                       | rev             | TAATACGACTCACTATAGGGGGGCTATTTAGCGGTCCAAAC  |        |
| <b><i>Amigo1</i></b>  | fw              | TGTGCGCCAGCAACATCCTC                       |        |
|                       | rev             | TAATACGACTCACTATAGGGGTATATGAGGACCAGAACCAC  |        |
| <b><i>Irx5</i></b>    | fw              | AACCGCTCGTCTGGCGGAAG                       |        |
|                       | rev             | TAATACGACTCACTATAGGGTGTGCGACATACCTTTCTTC   |        |
| <b><i>Lrp1b</i></b>   | fw              | CACTGTATCCAAGCACGATGG                      |        |
|                       | rev             | TAATACGACTCACTATAGGGGTGCTATGGTATTTCTCAGTCC |        |
| <b><i>Zfp804a</i></b> | fw              | CACATTAACATATGACCACG                       |        |
|                       | rev             | TAATACGACTCACTATAGGGCCTCTGTGGTCATCTGTGCTG  |        |
| <b><i>Ngfr</i></b>    | fw              | GGAGGTGCCAAGGAGACATG                       |        |
|                       | rev             | TAATACGACTCACTATAGGGCACAGGCTCTCCACAATGTC   |        |
|                       |                 |                                            |        |
| <b>Gene</b>           | Primer Sequence |                                            | Source |
| <b>Chicken</b>        | (5'-3')         |                                            |        |
| <b><i>Pappa2</i></b>  | fw              | ACGTCGCCAGCCTGAACTGC                       |        |
|                       | rev             | TAATACGACTCACTATAGGGTCCTGGTCACAGTCAGCAGC   |        |
| <b><i>Irx5</i></b>    | fw              | TCGGTGCGAGGGGCAGAGAC                       |        |
|                       | rev             | TAATACGACTCACTATAGGGGCGTTCGCTTCTTGCGGTAC   |        |
| <b><i>Lrp1b</i></b>   | fw              | GATCATCCACAGTACTAGC                        |        |
|                       | rev             | TAATACGACTCACTATAGGGACTGGGCATTTAGTTCATCTG  |        |
| <b><i>Znf804a</i></b> | fw              | CTGTACACTGATGCACAATACAC                    |        |
|                       | rev             | TAATACGACTCACTATAGGGGCTTCAGCATCACCACATTC   |        |
| <b><i>Ngfr</i></b>    | fw              | CTCCAAGTGCTTGACTAAGATG                     |        |
|                       | rev             | TAATACGACTCACTATAGGGATGAGGTTATCGGCGGTGCC   |        |
