# Supplementary material
Source: PubMed Central journal article supplement (PMC5808577)

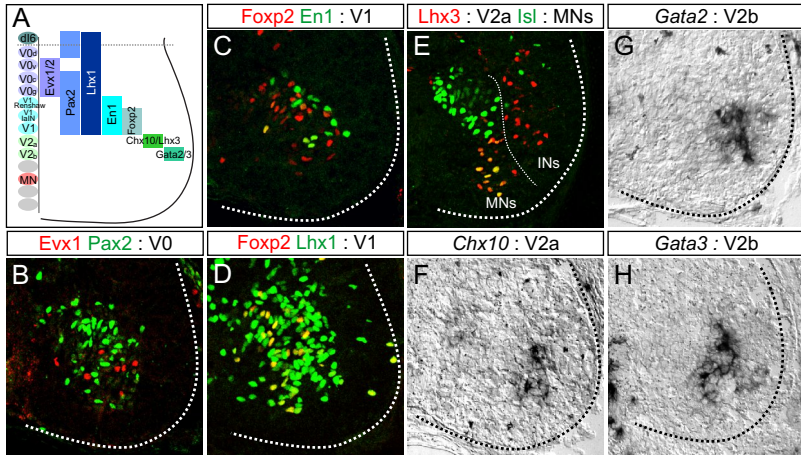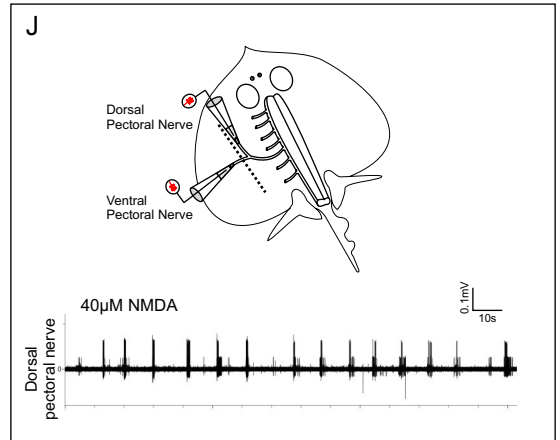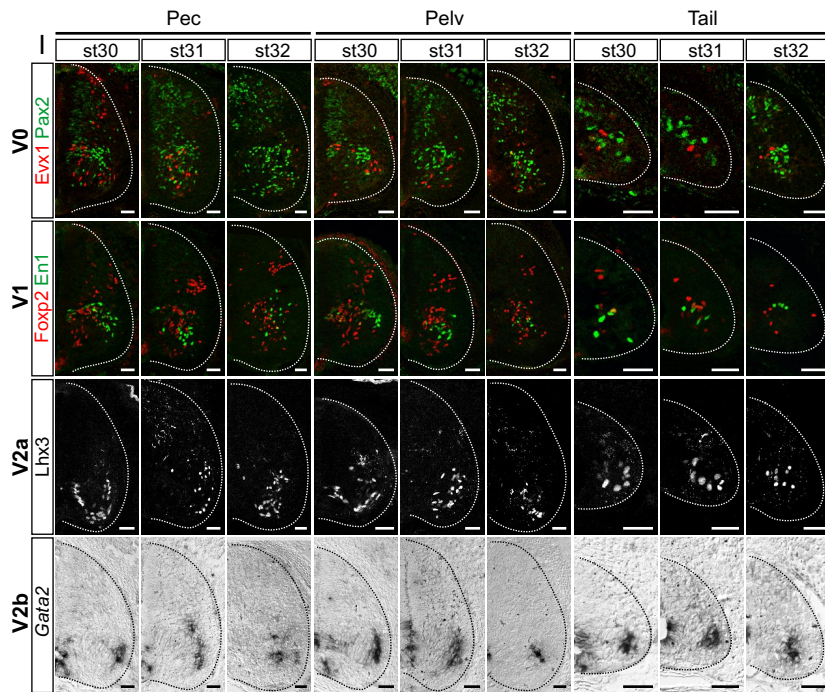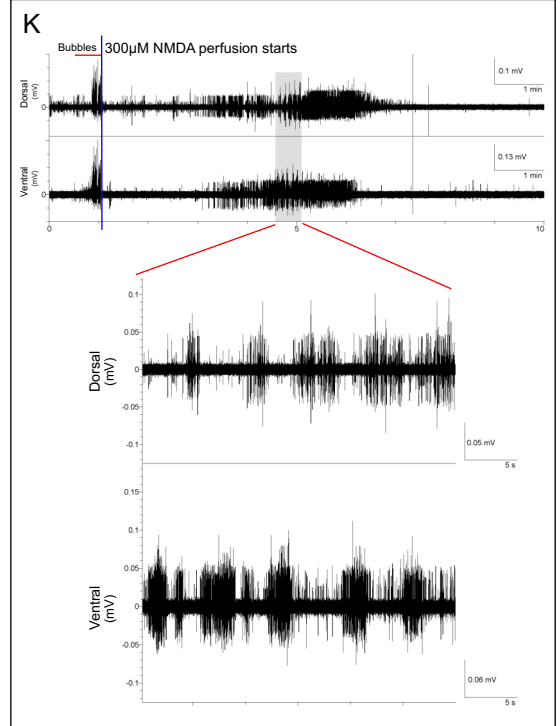

Supplement: NIHMS933817-supplement-1.pdf [file NIHMS933817-supplement-1.pdf]

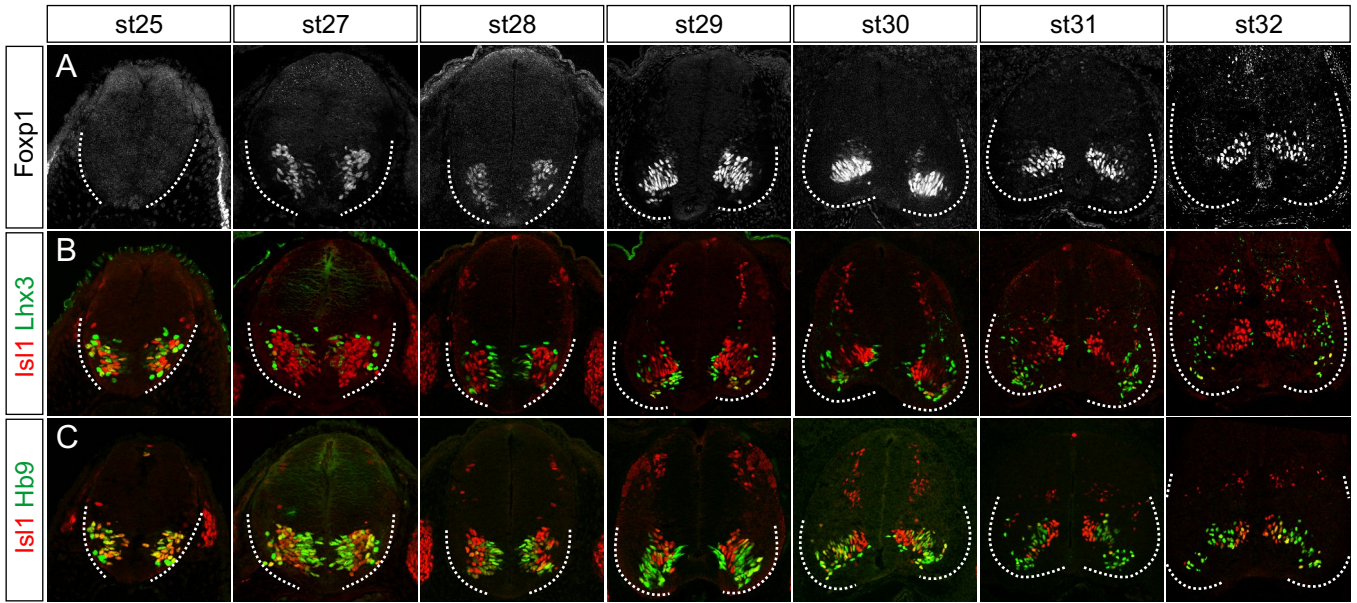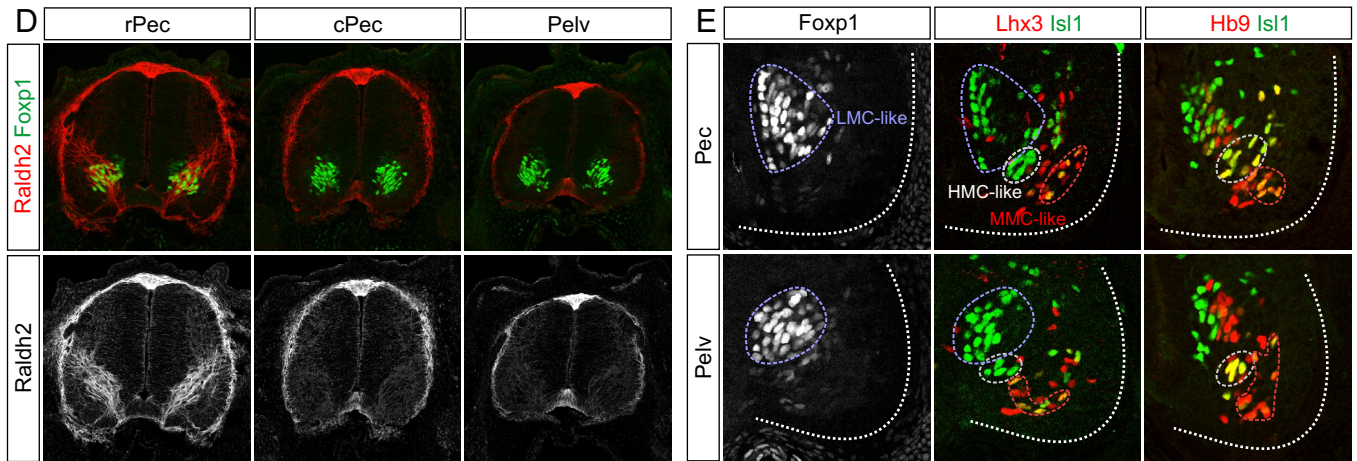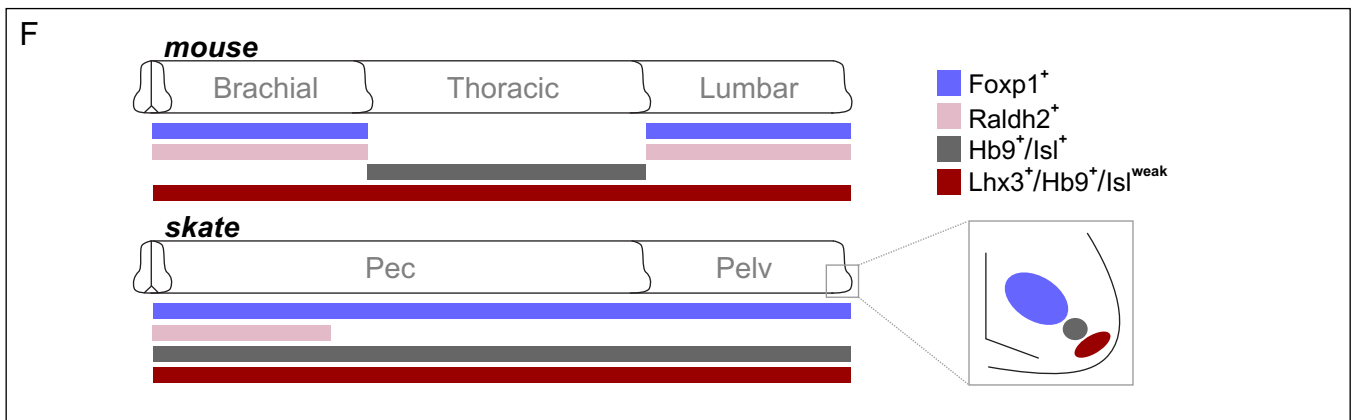

Supplement: NIHMS933817-supplement-2.pdf [file NIHMS933817-supplement-2.pdf]
